# Supplementary material for: An upper limit for slow-earthquake zones: self-oscillatory behavior through the Hopf bifurcation mechanism from a spring-block model under lubricated surfaces
Source: Copernicus journal article supplement (doi:10.5194/npg-24-419-2017), 2017-08-04

Supplement of Nonlin. Processes Geophys., 24, 419–433, 2017  
<https://doi.org/10.5194/npg-24-419-2017-supplement>  
© Author(s) 2017. This work is distributed under  
the Creative Commons Attribution 3.0 License.

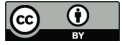

Nonlinear Processes  
in Geophysics

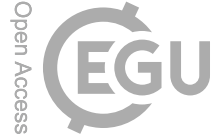

*Supplement of*

## **An upper limit for slow-earthquake zones: self-oscillatory behavior through the Hopf bifurcation mechanism from a spring-block model under lubricated surfaces**

**Valentina Castellanos-Rodríguez et al.**

*Correspondence to:* Castellanos-Rodríguez Valentina ([valentina@cimat.mx](mailto:valentina@cimat.mx))

The copyright of individual parts of the supplement might differ from the CC BY 3.0 License.

(a)  $\Pi_1=(0.25,0.8,1.8) \omega=0$

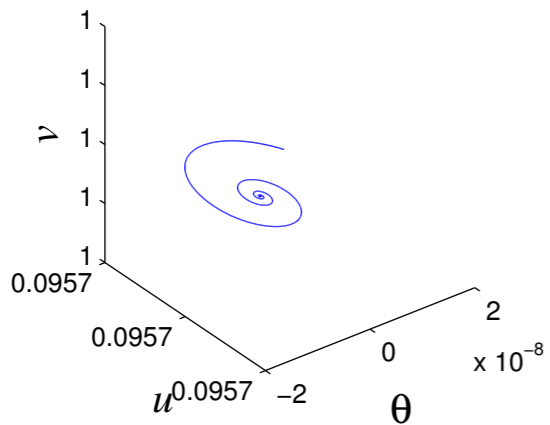

(b)  $\Pi_2=(0.25,0.8,.5) \omega=0$

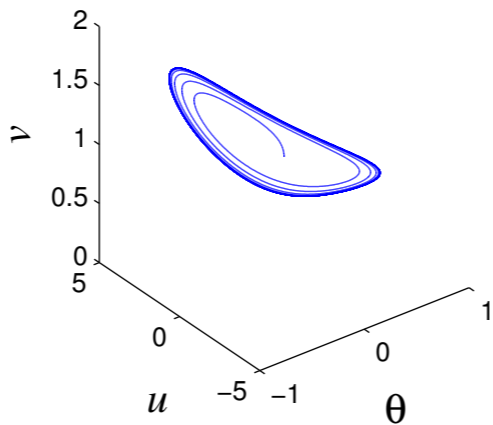

(c)  $\Pi_3=(0.25,0.8,3) \omega=.1$

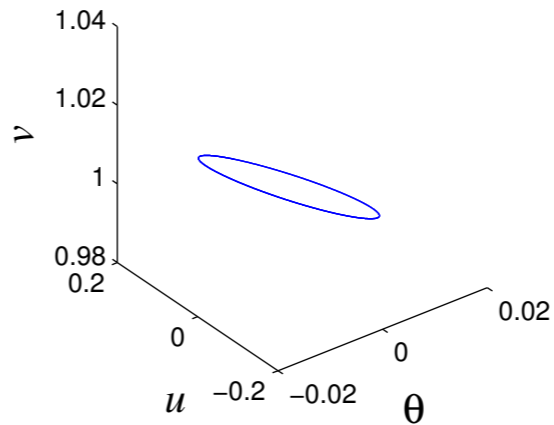

(d)  $\Pi_4=(0.25,0.8,.5) \omega=.1$

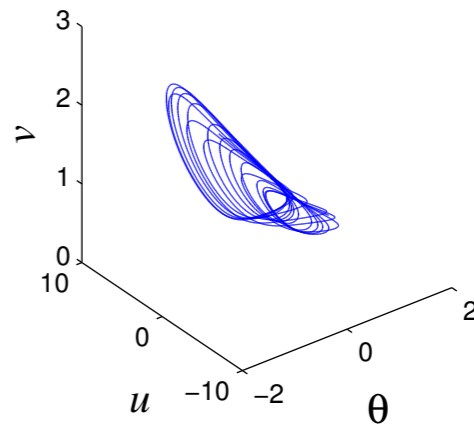

(e)  $\Pi_1 \omega=0$

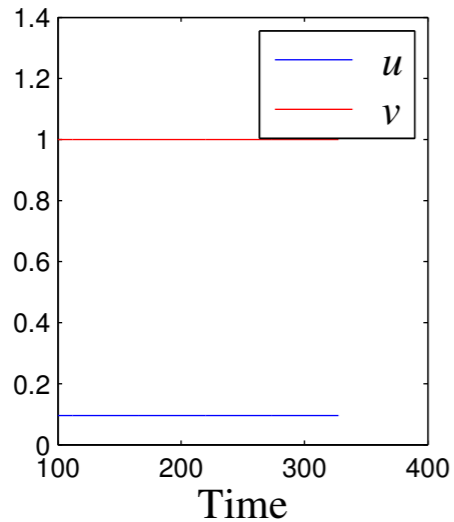

(f)  $\Pi_2 \omega=0$

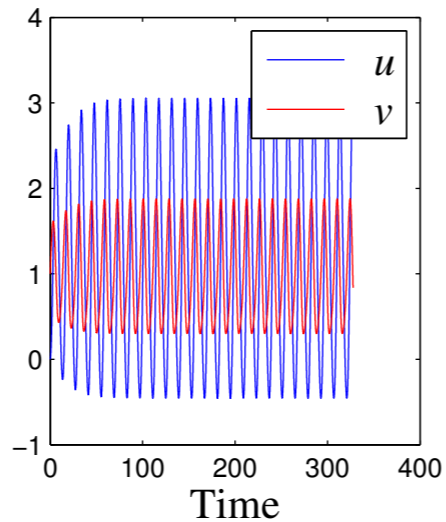

(g)  $\Pi_3 \omega=.1$

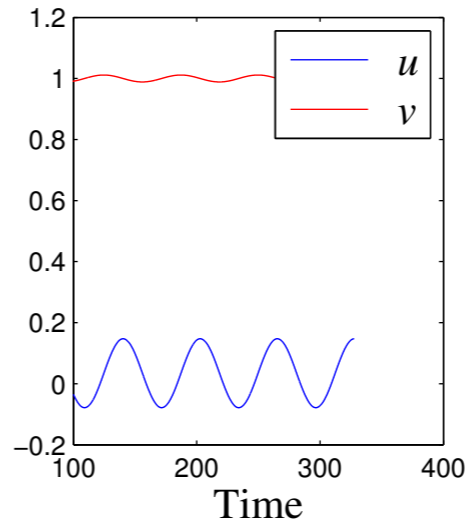

(h)  $\Pi_4 \omega=.1$

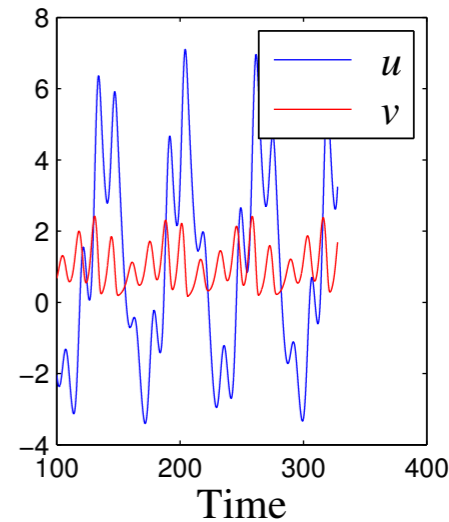

Supplement: Supplementary file 1 [file npg-24-419-2017-supplement.pdf]
